# Supplementary material for: Human CardioChimeras: Creation of a Novel “Next‐Generation” Cardiac Cell
Source: PubMed Central journal article supplement — J Am Heart Assoc. 2020 Jan 4;9(1):e013452. doi: 10.1161/JAHA.119.013452 (PMC6988174; doi:10.1161/jaha.119.013452), 2020-01-04
Supplement: JAH3-9-e013452-s001.pdf [file JAH3-9-e013452-s001.pdf]

# **SUPPLEMENTAL MATERIAL**

**Table S1. List of media.**

| <b>Media</b>           | <b>Components</b>                                                                                                                                                                                                            |
|------------------------|------------------------------------------------------------------------------------------------------------------------------------------------------------------------------------------------------------------------------|
| Human cCIC Media       | 10% ES FBS, 1% Penicillin-Streptomycin-Glutamine (100X), 5 mU/mL human erythropoietin, 10 ng/mL human recombinant basic FGF, 0.2 mmol/L L-Glutathione in F12 HAM's (1x)                                                      |
| Human MSC Media        | 20% FBS, 1% Penicillin-Streptomycin-Glutamine (100X) in 10.1 g/L Minimum Essential Medium Eagle, Alpha Modification                                                                                                          |
| Human Fusin Media      | 15% ES-FBS, 1% Penicillin-Streptomycin-Glutamine (100X), 5 mU/mL human erythropoietin, 10 ng/mL human recombinant basic FGF, 0.2 mmol/L L-Glutathione, 0.2 mg/ml human IL-6, 0.25 mg/ml human LIF in F12 HAM's (1x)          |
| KH Buffer              | 125 mmol/L NaCl, 8 mmol/L KCl, 1.2 mmol/L $\text{KH}_2\text{PO}_4$ , 1.25 mmol/L $\text{MgSO}_4$ , 1.2 mmol/L $\text{CaCl}_2$ , 6.25 mmol/L $\text{NaHCO}_3$ , 20 mmol/L deoxy-glucose, 5 mmol/L Na-lactate, 20 mmol/L HEPES |
| NRCM Plating Media     | 15% FBS, 1% Penicillin-Streptomycin-Glutamine (100X) in medium 199                                                                                                                                                           |
| NRCM Maintenance Media | 10% FBS, 1% Penicillin-Streptomycin-Glutamine (100X) in medium 199                                                                                                                                                           |

**Table S2. List of Antibodies.**

| <b>Antibody</b>    | <b>Manufacturer</b> | <b># Catalog</b> | <b>Dilution</b> | <b>Application</b>  |
|--------------------|---------------------|------------------|-----------------|---------------------|
| GFP anti rabbit    | Thermofisher        | A11122           | 1:80            | Immunocytochemistry |
| mCherry anti Rat   | Thermofisher        | M11217           | 1:80            | Immunocytochemistry |
| DAPI               | Sigma               | D9542            | 1:5000          | Immunocytochemistry |
| GFP anti Goat      | Rockland            | 35059            | 1:500           | Immunoblotting      |
| mCherry anti mouse | Abcam               | Ab125096         | 1:500           | Immunoblotting      |
| GAPDH anti Goat    | Sicgen              | AB0067           | 1:3000          | Immunoblotting      |
| Annexin V-APC      | Biosciences         | 550475           | 1:175           | Cell death assay    |
| Sytox Blue         | Life Technologies   | S11348           | 1:2000          | Cell death assay    |
| Propidium Iodide   | Invitrogen          | P3566            | 1:75            | Ploidy analysis     |

**Table S3. qRT PCR primer list.**

| <b>mRNA</b>    | <b>Forward</b>                 | <b>Reverse</b>               |
|----------------|--------------------------------|------------------------------|
| <b>Primers</b> |                                |                              |
| GATA 4         | CTCAGAAGGCAGAGAGTGTGTCAA       | CACAGATAGTGACCCGTCCCAT       |
| TNNT2          | GGAGAGAGAGTGGACTTTATG          | CCTCCTCTTTCTTCCTGTTTC        |
| PECAM1         | CCAAGCCCGAACTGGAATCT           | CACTGTCCGACTTTGAGGCT         |
| SMA            | CCCAGCCAAGCACTGTCAGGAATC<br>CT | TCACACACCAAGGCAGTGCTGT<br>CC |
| HB-EGF         | ACAAGGAGGAGCACGGGAAAAG         | CGATGACCAGCAGACAGACAGA<br>TG |

|      |                       |                       |
|------|-----------------------|-----------------------|
| HGF  | GGCTGGGGCTACACTGGATTG | CCACCATAATCCCCCTCACAT |
| SDF  | CAGTCAACCTGGGCAAAGCC  | AGCTTTGGTCCTGAGAGTCC  |
| FGF2 | CTGGCTATGAAGGAAGATGGA | TGCCCAGTTCGTTTCAGTG   |
| 18s  | CGAGCCGCCTGGATACC     | CATGGCCTCAGTTCCGAAAA  |

**Figure S1. Flow cytometry plots of one representative fusion experiment including**

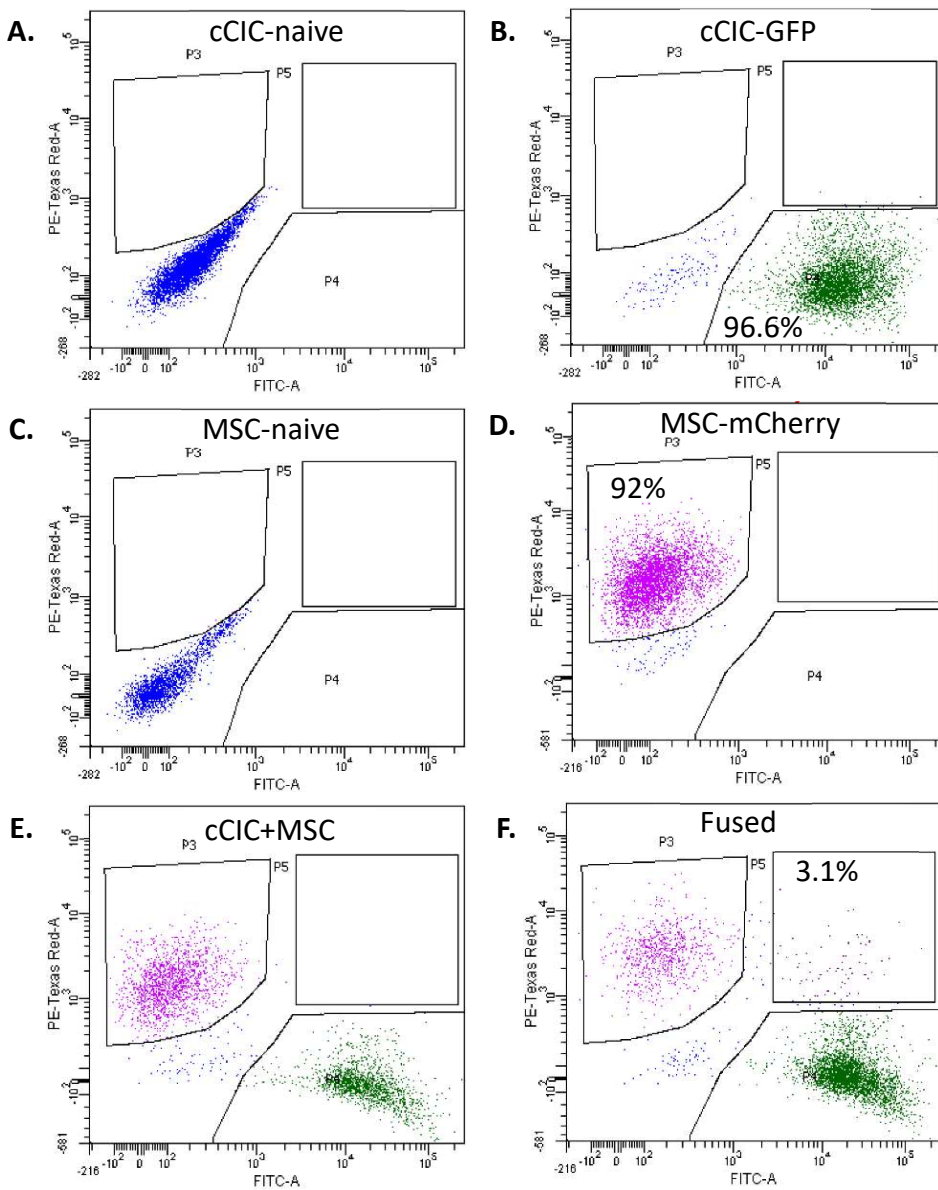

**A.** naive cCICs, **B.** cCIC-GFP, **C.** naive MSCs, **D.** MSC-mCherry, **E.** the combinatorial cCIC and MSC group as the negative control and **F.** Sendai virus-induced fused cells.

Figure S2. Live native fluorescent images of hCCs illustrating double positivity of the fused cells.

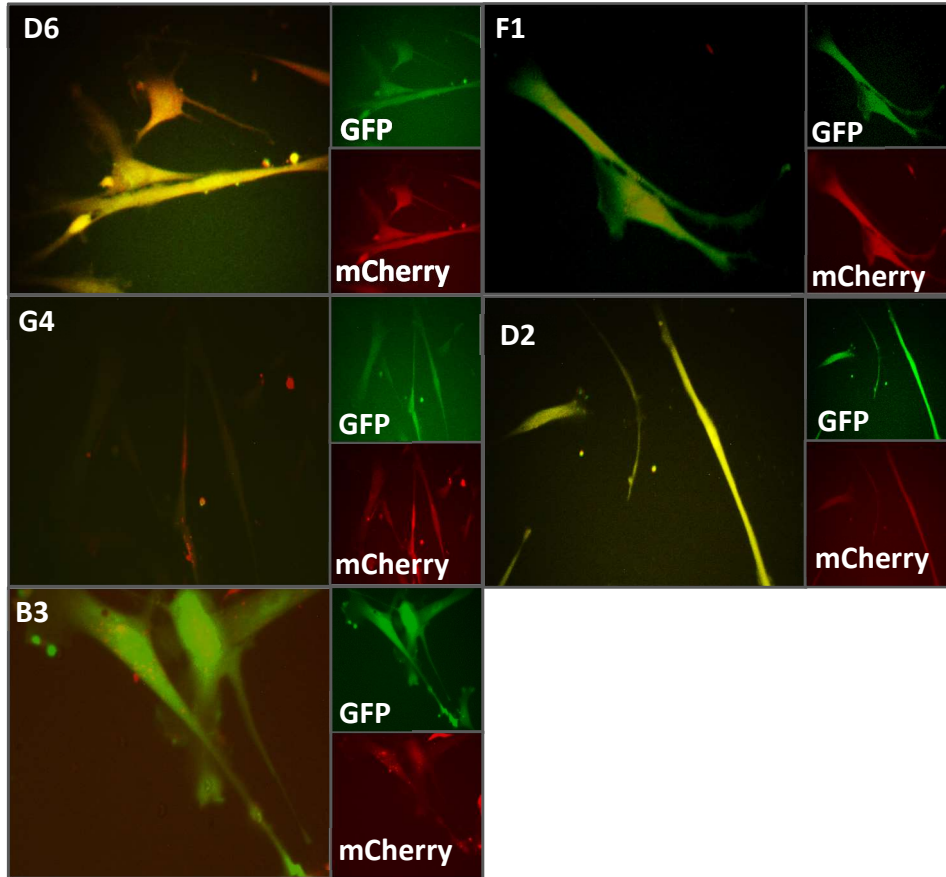

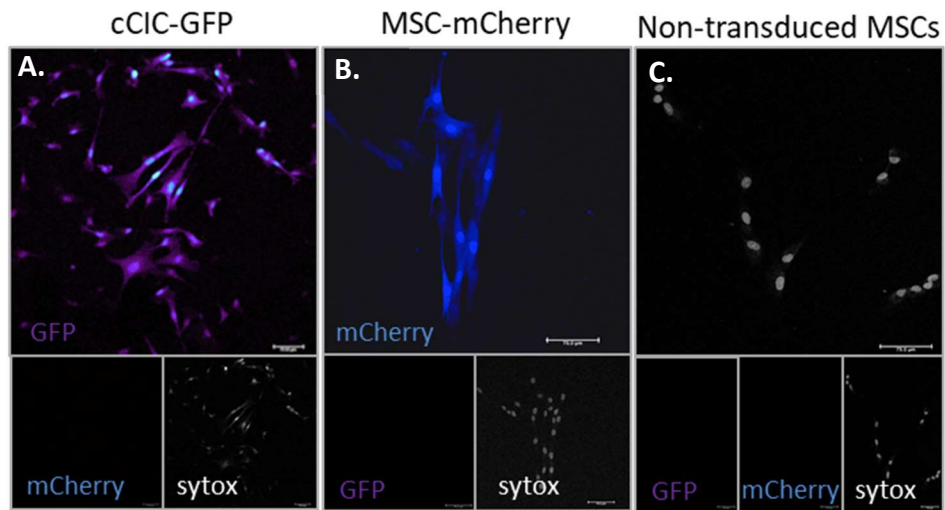

**Figure S3. Immunocytochemistry images of A. cCIC-GFP, B. MSC-mCherry, and C. Non-transduced MSCs stained for GFP and mCherry. Sytox green was used as the nuclear stain.**

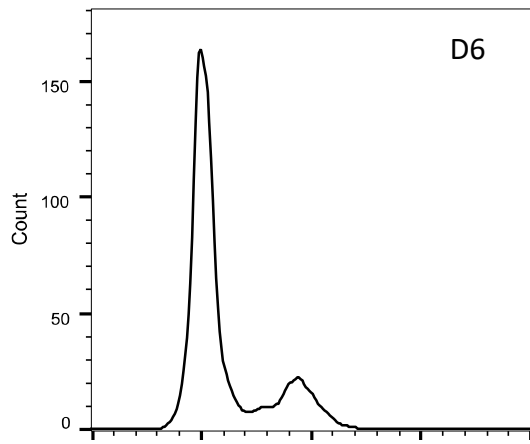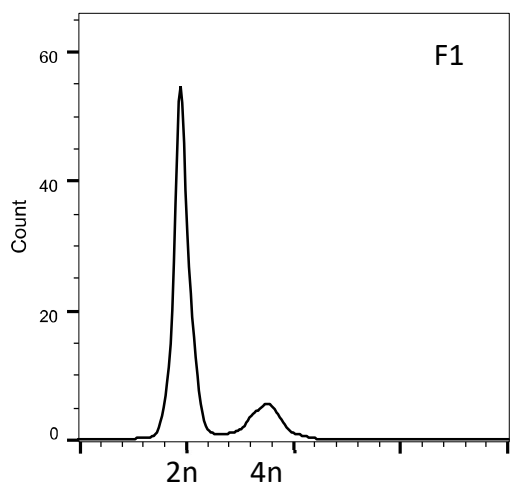

**Figure S4. Flow Cytometry plots for PI/RNase staining of hCCs D6 and F1.**



Figure S5. Percentage of survival (live cells) of D2 clones in cCIC media, cCICs in cCIC media, D2 clones in MSC media and MSCs in MSC media (from left to right) after treatment with hydrogen peroxide (350  $\mu\text{mol/L}$ ).

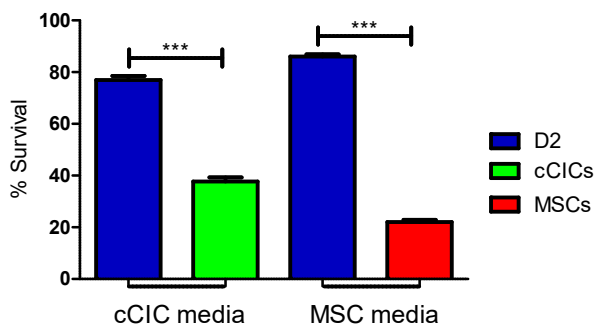

Error bars are  $\pm$  SEM. \*\*\*  $p < 0.001$

**Figure S6. Percentage of apoptotic, necrotic and live cells.**

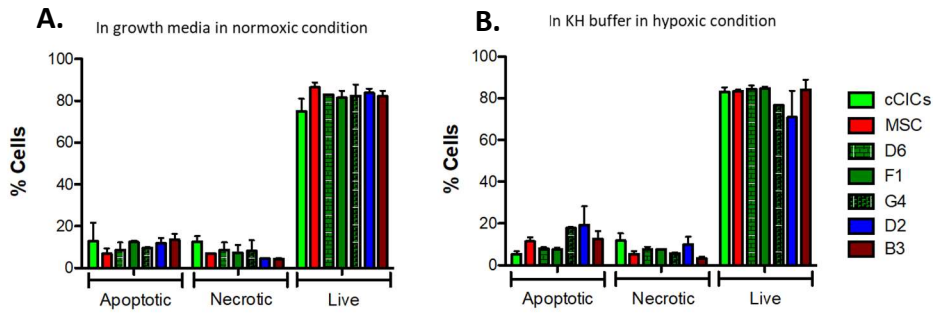

**A.** cultured in growth media in normoxic condition and **B.** subjected to KH buffer in hypoxic condition. Error bars are  $\pm$  SEM.

**Figure S7. Cell doubling time of hCCs up to and after passage 10 in culture represented in hours.**

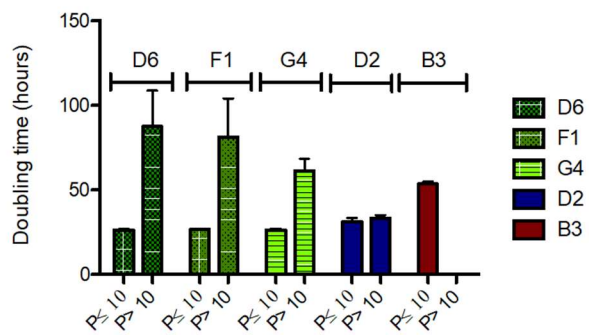

Error bars are  $\pm$  SEM.
